# Supplementary material for: Ingestion of Lacticaseibacillus rhamnosus Fmb14 prevents depression-like behavior and brain neural activity via the microbiota–gut–brain axis in colitis mice
Source: Royal Society of Chemistry journal article supplement (doi:10.1039/d2fo04014j), 2023-01-01
Supplement: d2fo04014j2.pdf [file d2fo04014j2.pdf]

# Supplementary Materials for

## Ingestion of *Lacticaseibacillus rhamnosus* Fmb14 prevents depression-like behavior and brain neural activity via the microbiota-gut-brain axis

Hongyuan Zhao<sup>1</sup>, Xiaoyu Chen<sup>1</sup>, Li Zhang<sup>3</sup>, Chao Tang<sup>1</sup>, Fanqiang Meng<sup>1</sup>,  
Libang Zhou<sup>1</sup>, Ping Zhu<sup>1</sup>, Zhaoxin Lu<sup>1\*</sup>, Yingjian Lu<sup>2\*</sup>

\*Corresponding author. Email: fmb@njau.edu.cn

Table 1. The abbreviations of regulated pathway of control to model group

| Pathway            | Description                                                                | logFC  | P-value      |
|--------------------|----------------------------------------------------------------------------|--------|--------------|
| PWY0-1338          | polymyxin resistance                                                       | 2.373  | 0.0006<br>07 |
| PWY-7391           | isoprene biosynthesis II (engineered)                                      | 2.166  | 0.0182<br>4  |
| CODH-PWY           | reductive acetyl coenzyme A pathway                                        | 1.719  | 0.0040<br>96 |
| GLUCOSE1PMETAB-PWY | glucose and glucose-1-phosphate degradation                                | 1.681  | 0.0044<br>88 |
| SO4ASSIM-PWY       | sulfate reduction I (assimilatory)                                         | 1.024  | 0.0018<br>05 |
| PWY-5837           | 1,4-dihydroxy-2-naphthoate biosynthesis I                                  | 0.9987 | 0.0158       |
| PWY-5863           | superpathway of phylloquinol biosynthesis                                  | 0.9791 | 0.0167<br>8  |
| PYRIDOXSYN-PWY     | pyridoxal 5'-phosphate biosynthesis I                                      | 0.8841 | 0.0213<br>5  |
| PWY0-1241          | ADP-L-glycero-&beta;-D-manno-heptose biosynthesis                          | 0.8619 | 0.0208<br>9  |
| PWY-7328           | superpathway of UDP-glucose-derived O-antigen building blocks biosynthesis | 0.8474 | 0.0045<br>22 |
| PWY0-845           | superpathway of pyridoxal 5'-phosphate biosynthesis and salvage            | 0.8103 | 0.0172<br>8  |
| PWY-5345           | superpathway of L-methionine biosynthesis (by sulfhydrylation)             | 0.783  | 0.0053<br>29 |
| SULFATE-CYS-PWY    | superpathway of sulfate assimilation                                       | 0.7508 | 0.0072       |

|                                           |                                                                        |         |              |
|-------------------------------------------|------------------------------------------------------------------------|---------|--------------|
|                                           | and cysteine biosynthesis                                              |         | 19           |
| <b>PWY-7539</b>                           | 6-hydroxymethyl-dihydropterin diphosphate biosynthesis III (Chlamydia) | -0.6423 | 0.0216<br>9  |
| <b>SER-GLYSYN-PWY</b>                     | superpathway of L-serine and glycine biosynthesis I                    | -0.657  | 0.0006<br>59 |
| <b>PYRIDNUCSAL-PWY</b>                    | NAD salvage pathway I                                                  | -0.6619 | 0.0162       |
| <b>PWY-6182</b>                           | superpathway of salicylate degradation                                 | -0.6652 | 0.0060<br>97 |
| <b>P4-PWY</b>                             | superpathway of L-lysine, L-threonine and L-methionine biosynthesis I  | -0.6674 | 0.0235<br>3  |
| <b>ANAEROFrucAT-PWY</b>                   | homolactic fermentation                                                | -0.6695 | 0.0054<br>61 |
| <b>PROTocatechuate-Ortho-Cleavage-PWY</b> | protocatechuate degradation II (ortho-cleavage pathway)                | -0.6933 | 0.0113<br>8  |
| <b>PWY0-781</b>                           | aspartate superpathway                                                 | -0.6979 | 0.0204<br>8  |
| <b>ASPASN-PWY</b>                         | superpathway of L-aspartate and L-asparagine biosynthesis              | -0.6999 | 0.0153       |
| <b>PWY0-1586</b>                          | peptidoglycan maturation (meso-diaminopimelate containing)             | -0.7036 | 0.0041<br>41 |
| <b>TRPSYN-PWY</b>                         | L-tryptophan biosynthesis                                              | -0.7049 | 0.0123<br>9  |
| <b>DAPLYSINESYN-PWY</b>                   | L-lysine biosynthesis I                                                | -0.7128 | 0.0063<br>96 |
| <b>GLYCOGENSYNTH-PWY</b>                  | glycogen biosynthesis I (from ADP-D-Glucose)                           | -0.7213 | 0.0055<br>79 |
| <b>P23-PWY</b>                            | reductive TCA cycle I                                                  | -0.7653 | 0.0156<br>5  |
| <b>PWY-5180</b>                           | toluene degradation I (aerobic) (via o-cresol)                         | -0.7707 | 0.0126<br>9  |
| <b>PWY-5182</b>                           | toluene degradation II (aerobic) (via 4-methylcatechol)                | -0.7707 | 0.0126<br>9  |
| <b>P221-PWY</b>                           | octane oxidation                                                       | -0.7823 | 0.0246       |
| <b>PWY-7242</b>                           | D-fructuronate degradation                                             | -0.7948 | 0.0082<br>8  |
| <b>PWY-6317</b>                           | galactose degradation I (Leloir pathway)                               | -0.7966 | 0.0102<br>8  |
| <b>PWY-5347</b>                           | superpathway of L-methionine biosynthesis (transsulfuration)           | -0.8039 | 0.0053<br>31 |
| <b>PENTOSE-P-PWY</b>                      | pentose phosphate pathway                                              | -0.8129 | 0.0072       |
| <b>MET-SAM-PWY</b>                        | superpathway of S-adenosyl-L-methionine biosynthesis                   | -0.8157 | 0.0071<br>17 |

|                              |                                                                    |         |              |
|------------------------------|--------------------------------------------------------------------|---------|--------------|
| <b>PWY-621</b>               | sucrose degradation III (sucrose invertase)                        | -0.8228 | 0.0046<br>16 |
| <b>PWY-6507</b>              | 4-deoxy-L-threo-hex-4-enopyranuronate degradation                  | -0.8299 | 0.0222<br>1  |
| <b>HOMOSER-METSYN-PWY</b>    | L-methionine biosynthesis I                                        | -0.833  | 0.0061<br>02 |
| <b>PWY-5028</b>              | L-histidine degradation II                                         | -0.9112 | 0.0028<br>67 |
| <b>PWY-722</b>               | nicotinate degradation I                                           | -0.9209 | 0.0089<br>18 |
| <b>P281-PWY</b>              | 3-phenylpropanoate degradation                                     | -0.9298 | 0.0086<br>74 |
| <b>GALACTUROCAT-PWY</b>      | D-galacturonate degradation I                                      | -0.9513 | 0.0015<br>22 |
| <b>PWY-5505</b>              | L-glutamate and L-glutamine biosynthesis                           | -0.9629 | 0.0010<br>51 |
| <b>GALACT-GLUCUROCAT-PWY</b> | superpathway of hexuronide and hexuronate degradation              | -1.027  | 0.0002<br>5  |
| <b>GLUCUROCAT-PWY</b>        | superpathway of &beta;-D-glucuronide and D-glucuronate degradation | -1.041  | 0.0002<br>58 |
| <b>PWY-6478</b>              | GDP-D-glycero-&alpha;-D-mannoheptose biosynthesis                  | -1.187  | 0.0121<br>4  |
| <b>PWY-5705</b>              | allantoin degradation to glyoxylate III                            | -1.379  | 0.0004<br>56 |
| <b>NAD-BIOSYNTHESIS-II</b>   | NAD salvage pathway II                                             | -1.406  | 0.0063<br>17 |
| <b>PWY-6731</b>              | starch degradation III                                             | -1.549  | 0.0013<br>32 |
| <b>P341-PWY</b>              | glycolysis V (Pyrococcus)                                          | -1.896  | 0.0017<br>3  |

Table 2. The abbreviations of regulated pathway of control to H-treat group

| <b>Pathway</b>          | <b>Description</b>                           | <b>logFC</b> | <b>P-value</b> |
|-------------------------|----------------------------------------------|--------------|----------------|
| <b>METH-ACETATE-PWY</b> | methanogenesis from acetate                  | 3.419        | 2.51E-09       |
| <b>SUCSYN-PWY</b>       | sucrose biosynthesis I (from photosynthesis) | 0.6402       | 0.000343       |
| <b>PWY-7347</b>         | sucrose biosynthesis III                     | 0.2552       | 0.000347       |

Table 3. The abbreviations of regulated pathway of control to M-treat group

| <b>Pathway</b>  | <b>Description</b>                  | <b>logFC</b> | <b>P-value</b> |
|-----------------|-------------------------------------|--------------|----------------|
| <b>PWY-1361</b> | benzoyl-CoA degradation I (aerobic) | 3.093        | 6.07E-05       |

|                              |                                                                            |         |          |
|------------------------------|----------------------------------------------------------------------------|---------|----------|
| <b>GLUCOSE1PMETAB-PWY</b>    | glucose and glucose-1-phosphate degradation                                | 2.025   | 0.002773 |
| <b>PWY-6404</b>              | superpathway of mycolyl-arabinogalactan-peptidoglycan complex biosynthesis | 1.415   | 1.43E-07 |
| <b>SO4ASSIM-PWY</b>          | sulfate reduction I (assimilatory)                                         | 1.128   | 0.000465 |
| <b>PYRIDOXSYN-PWY</b>        | pyridoxal 5'-phosphate biosynthesis I                                      | 1.069   | 0.00056  |
| <b>PWY-7328</b>              | superpathway of UDP-glucose-derived O-antigen building blocks biosynthesis | 1.065   | 4.1E-06  |
| <b>PWY0-845</b>              | superpathway of pyridoxal 5'-phosphate biosynthesis and salvage            | 1.064   | 1.99E-05 |
| <b>PWY-7254</b>              | TCA cycle VII (acetate-producers)                                          | 1.003   | 0.000152 |
| <b>PWY-5345</b>              | superpathway of L-methionine biosynthesis (by sulfhydrylation)             | 0.8744  | 0.002509 |
| <b>SULFATE-CYS-PWY</b>       | superpathway of sulfate assimilation and cysteine biosynthesis             | 0.7876  | 0.001119 |
| <b>PWY-5392</b>              | reductive TCA cycle II                                                     | 0.5427  | 2.33E-06 |
| <b>PENTOSE-P-PWY</b>         | pentose phosphate pathway                                                  | -0.6776 | 0.001585 |
| <b>GLYCOCAT-PWY</b>          | glycogen degradation I (bacterial)                                         | -0.7002 | 0.002792 |
| <b>SER-GLYSYN-PWY</b>        | superpathway of L-serine and glycine biosynthesis I                        | -0.7256 | 0.001903 |
| <b>MET-SAM-PWY</b>           | superpathway of S-adenosyl-L-methionine biosynthesis                       | -0.8179 | 0.00152  |
| <b>PWY-1541</b>              | superpathway of taurine degradation                                        | -1.026  | 0.001825 |
| <b>GALACT-GLUCUROCAT-PWY</b> | superpathway of hexuronide and hexuronate degradation                      | -1.221  | 0.001255 |
| <b>GLUCUROCAT-PWY</b>        | superpathway of &beta;-D-glucuronide and D-glucuronate degradation         | -1.236  | 0.000633 |
| <b>GALACTUROCAT-PWY</b>      | D-galacturonate degradation I                                              | -1.241  | 0.002675 |
| <b>PWY-3661</b>              | glycine betaine degradation I                                              | -2.841  | 0.000684 |

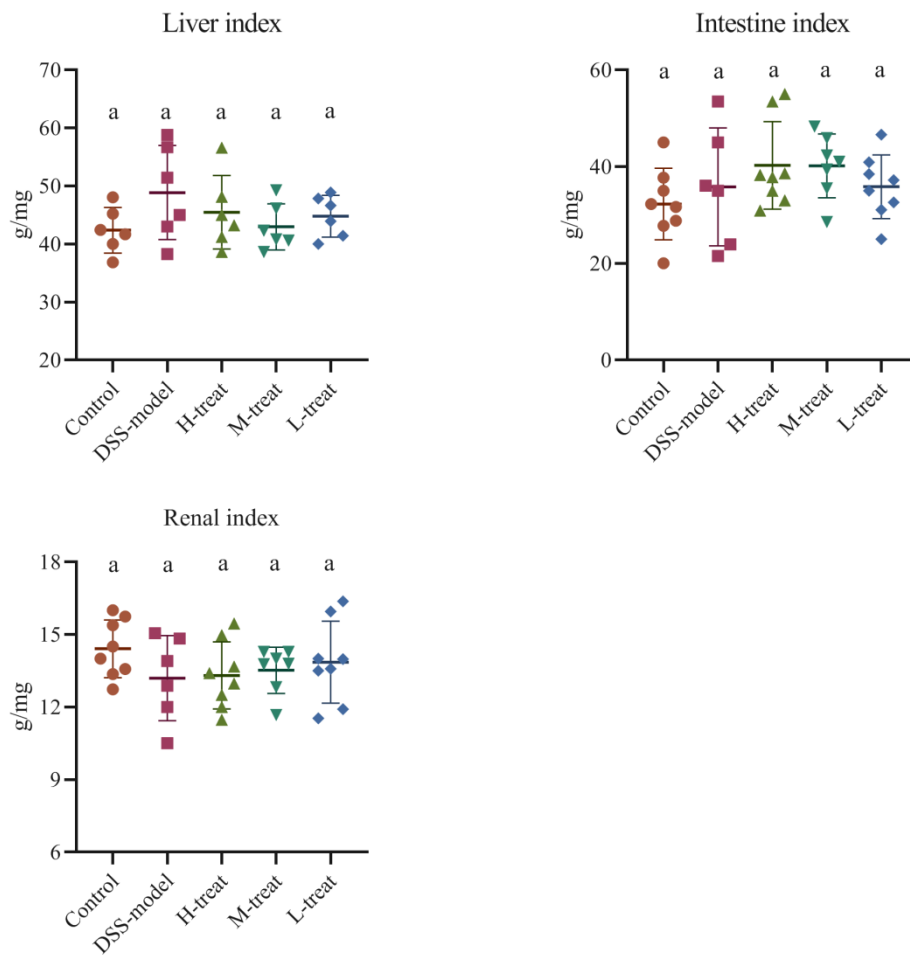

**Figure 1.** The effect of Fmb14 treatment on organ index of DSS-induced mice. The mean  $\pm$  SD ( $n > 6$  per group) was represented by bars, different lowercase letters represent significant differences at  $p < 0.05$ , labels a to d represent lower to upper levels, respectively.

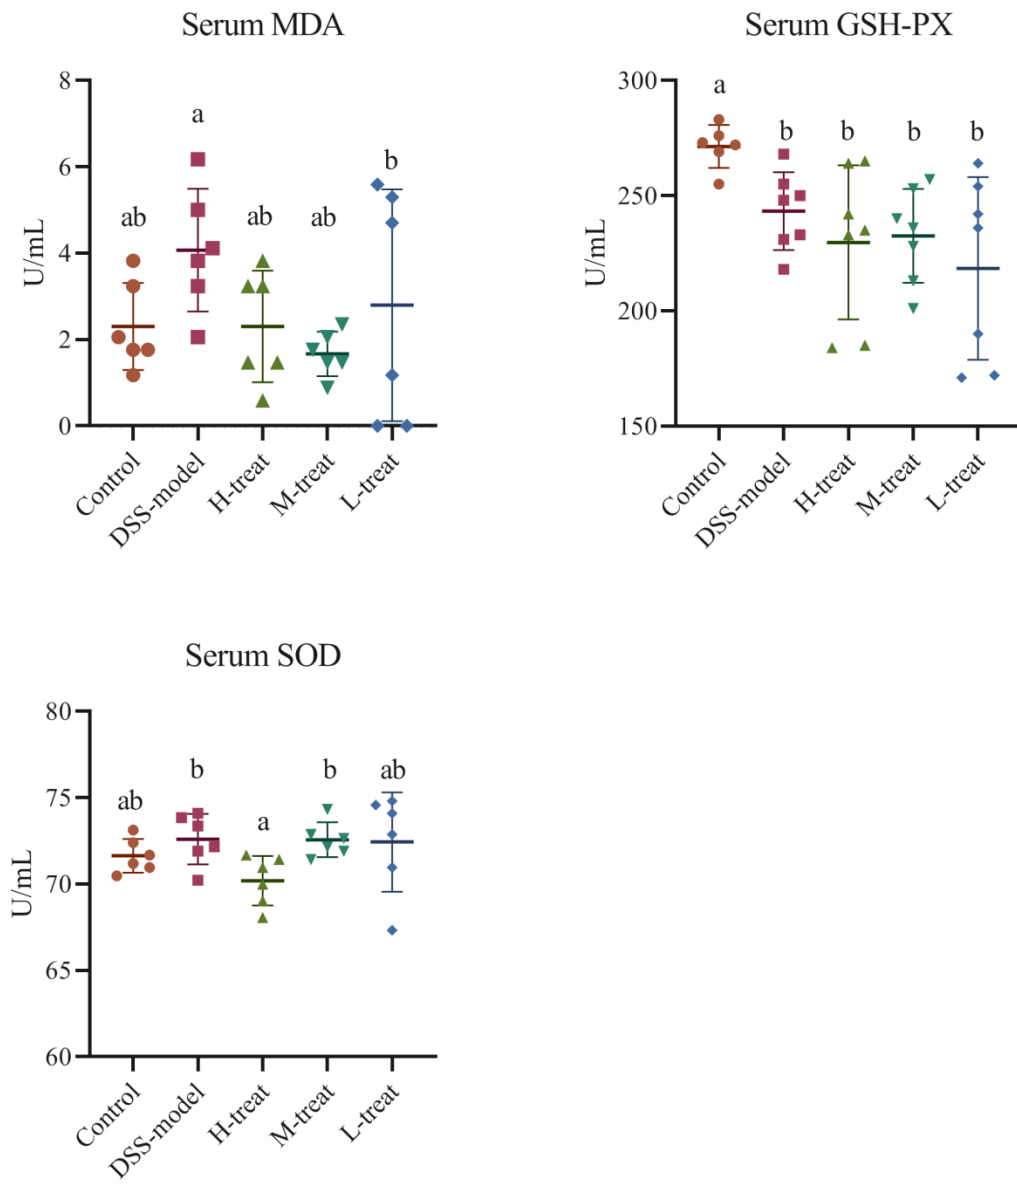

**Figure 2.** The effect of Fmb14 treatment on serum antioxidant of DSS-induced mice. The mean  $\pm$  SD ( $n > 6$  per group) was represented by bars, different lowercase letters represent significant differences at  $p < 0.05$ , labels a to d represent lower to upper levels, respectively.

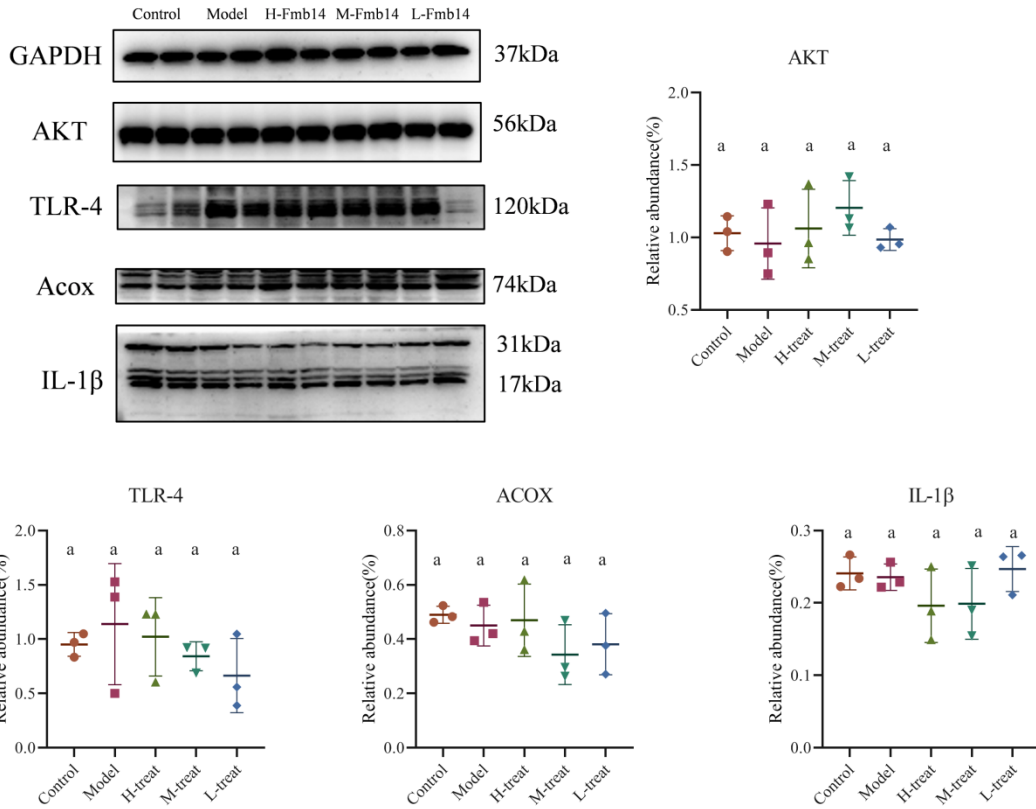

**Figure 3.** The effect of Fmb14 treatment on brain biomarkers of DSS-induced mice. The mean  $\pm$  SD (n >3 per group) was represented by bars, different lowercase letters represent significant differences at  $p < 0.05$ , labels a to d represent lower to upper levels, respectively.

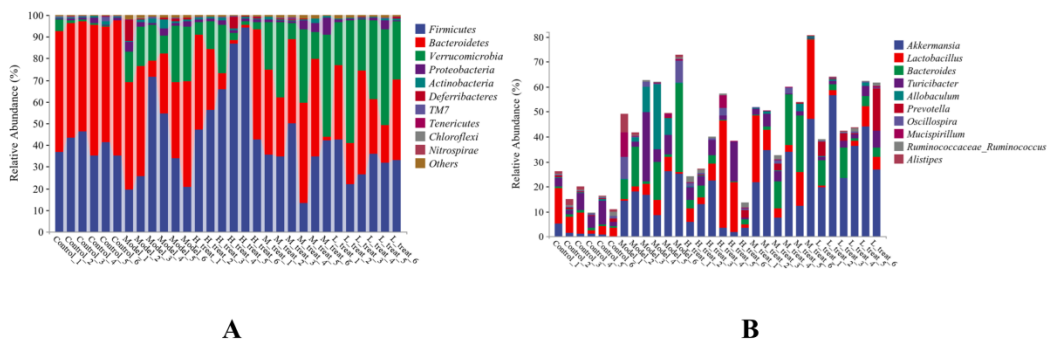

**Figure 4.** Effects of *L. rhamnosus* Fmb14 treatment on the microbial diversity of the gut microbiota in mice at Phylum(A) and Genus (B) levels.

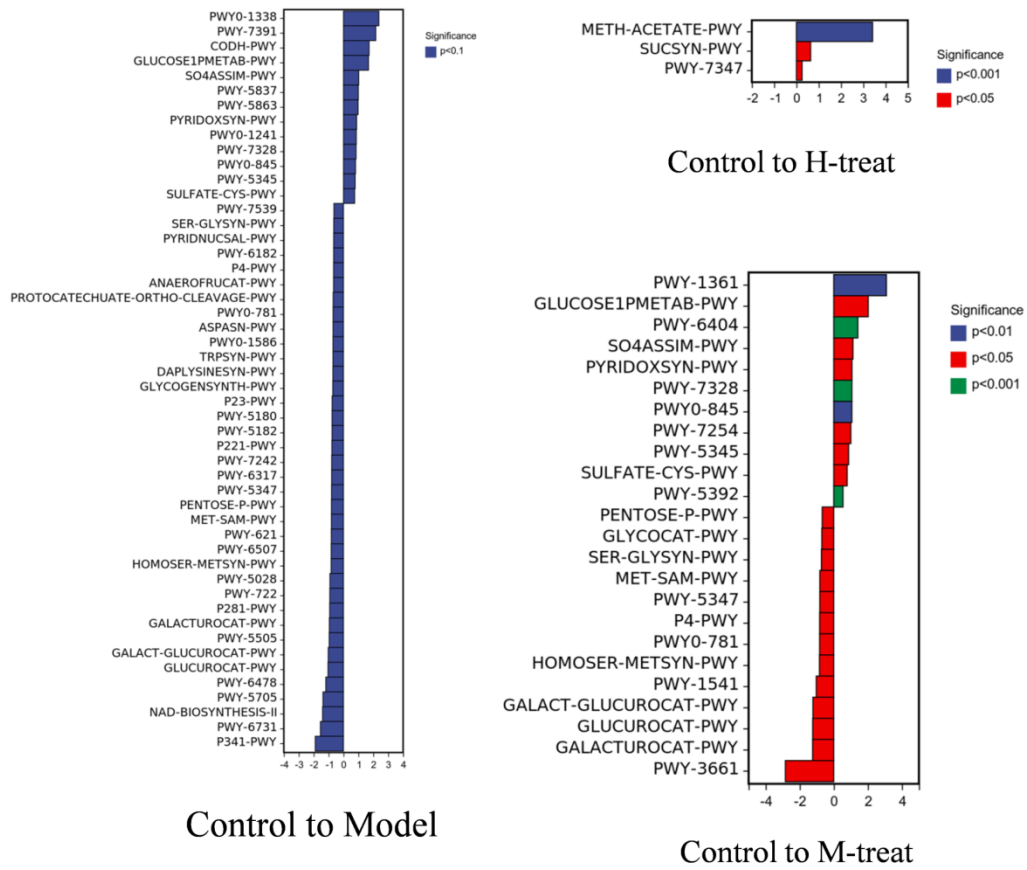

**Figure 5.** Effects of *L. rhamnosus* Fmb14 treatment on the metabolism pathways of the gut microbiota in mice.
