# Supplementary figures and images for: Ingestion of Lacticaseibacillus rhamnosus Fmb14 prevents depression-like behavior and brain neural activity via the microbiota–gut–brain axis in colitis mice
Source: Royal Society of Chemistry journal article supplement (doi:10.1039/d2fo04014j), 2023-01-01

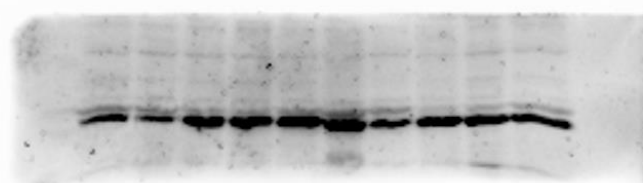

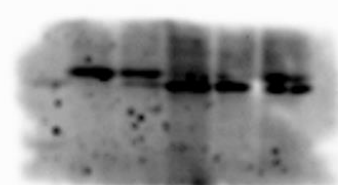

Supplement: d2fo04014j1.zip [file d2fo04014j1.zip]

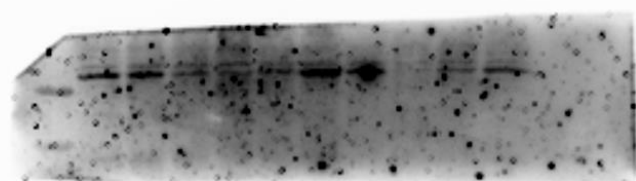

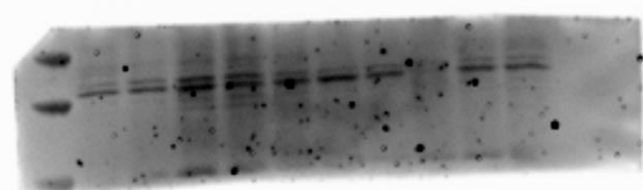

Supplement: d2fo04014j1.zip [file d2fo04014j1.zip]

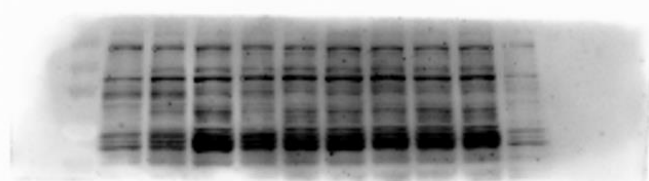

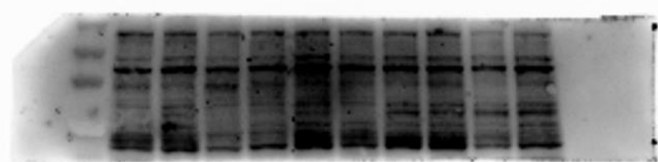

Supplement: d2fo04014j1.zip [file d2fo04014j1.zip]

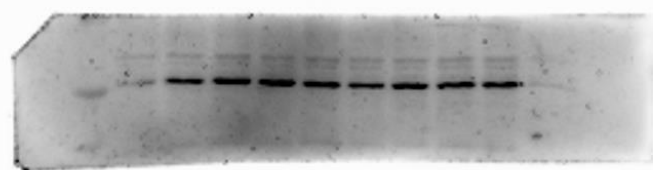

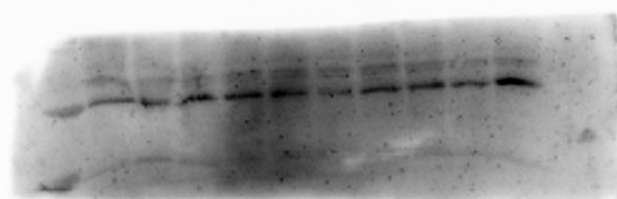

Supplement: d2fo04014j1.zip [file d2fo04014j1.zip]

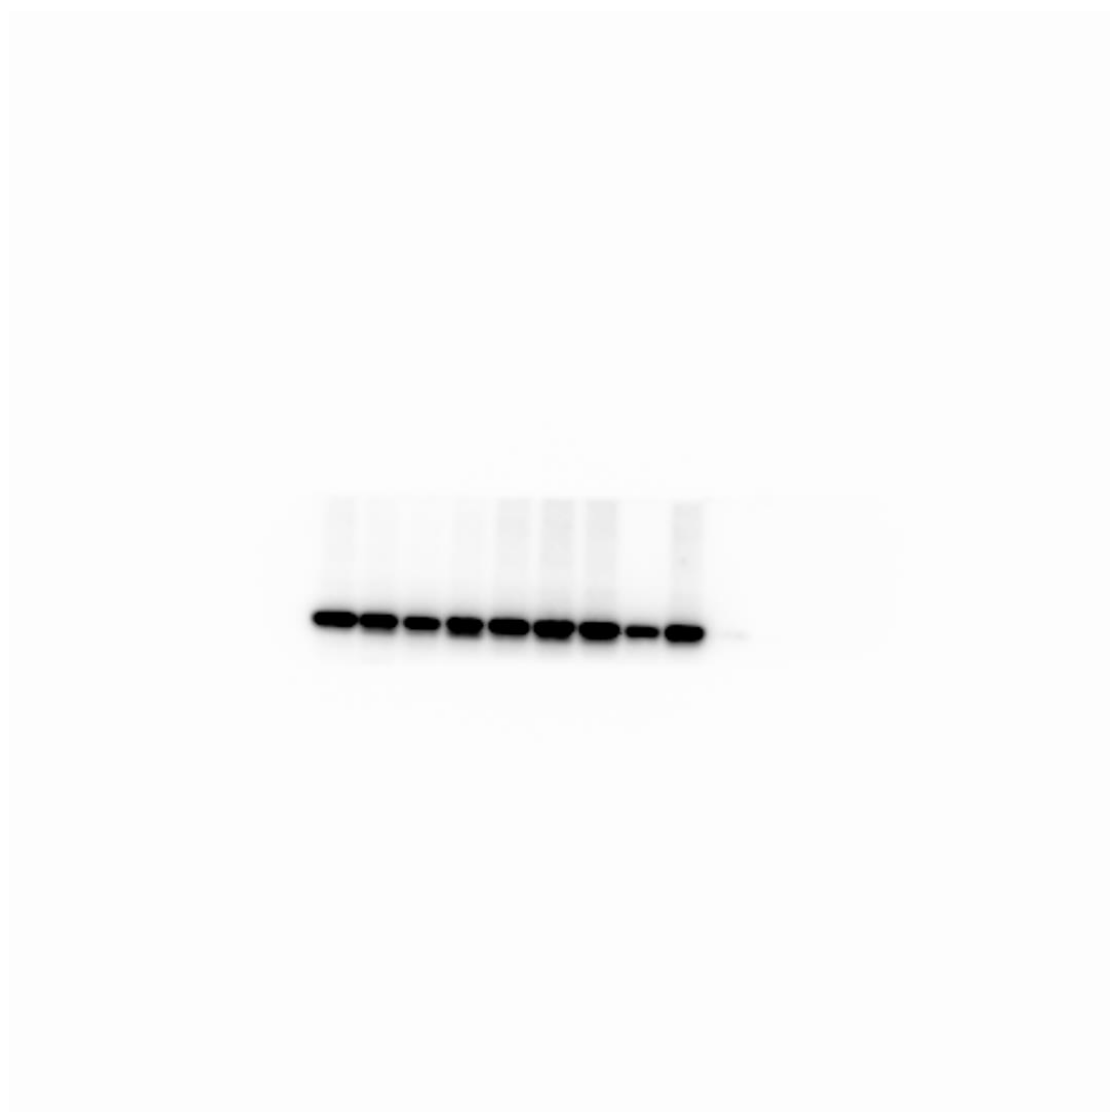

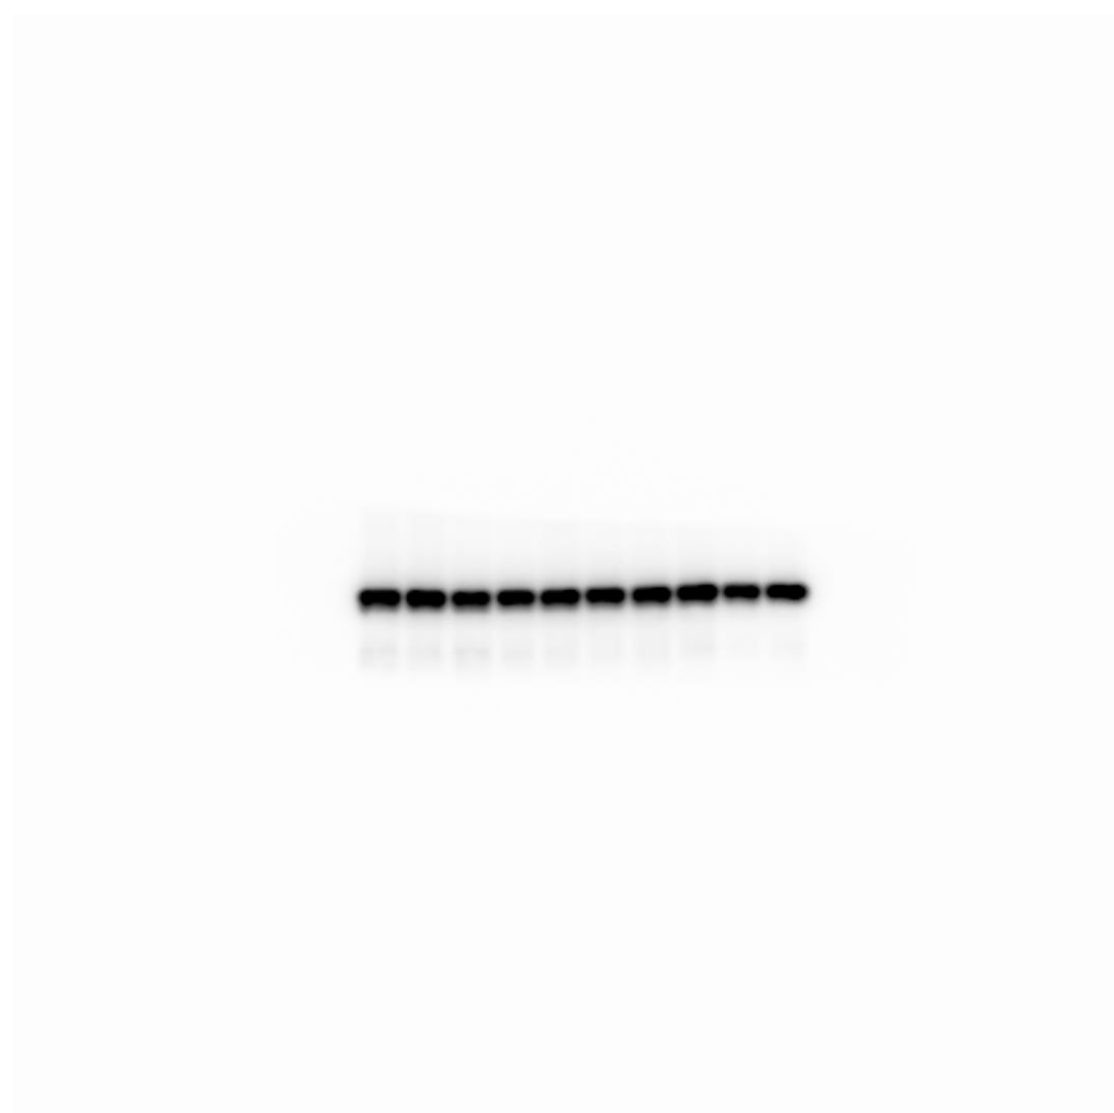

Supplement: d2fo04014j1.zip [file d2fo04014j1.zip]

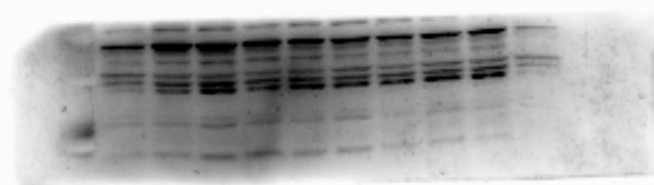

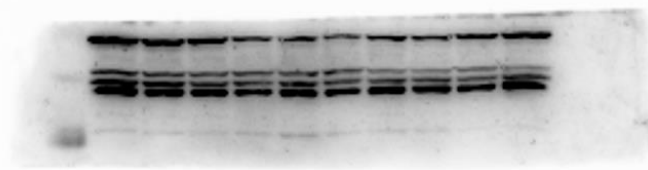

Supplement: d2fo04014j1.zip [file d2fo04014j1.zip]

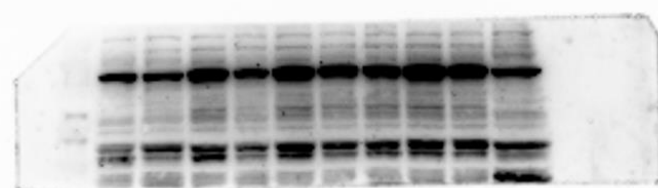

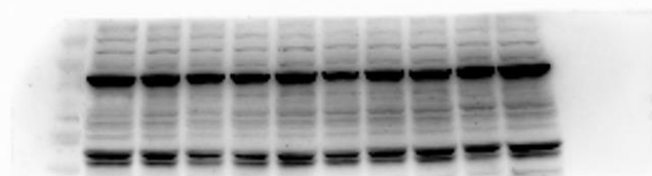

Supplement: d2fo04014j1.zip [file d2fo04014j1.zip]

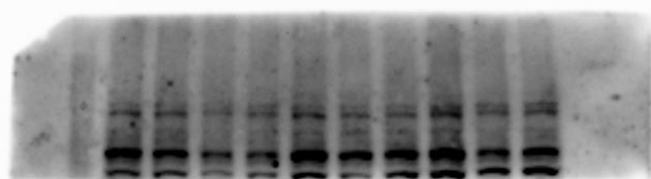

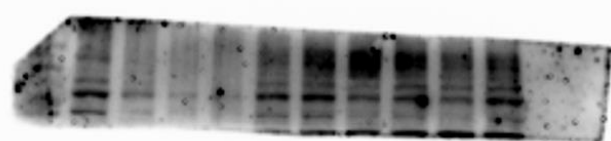

Supplement: d2fo04014j1.zip [file d2fo04014j1.zip]

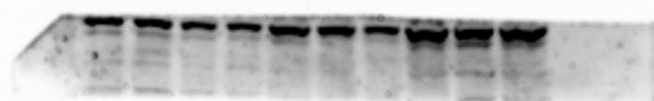

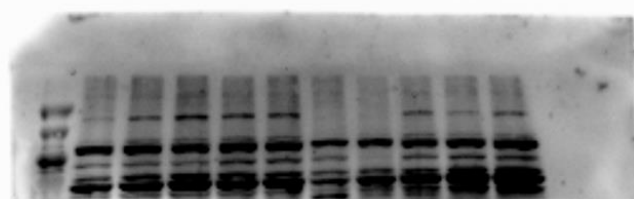

Supplement: d2fo04014j1.zip [file d2fo04014j1.zip]

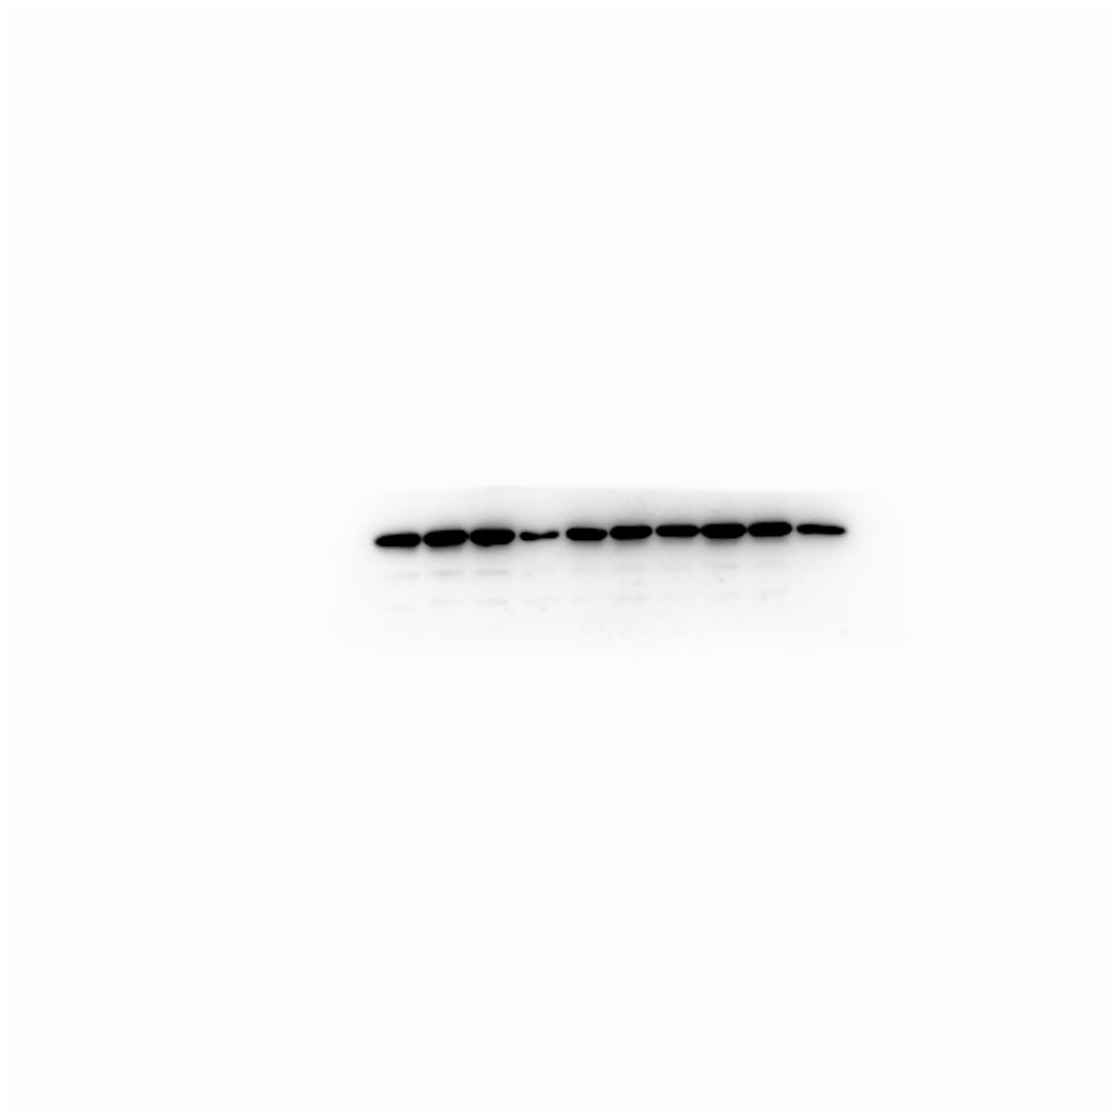

-----

Supplement: d2fo04014j1.zip [file d2fo04014j1.zip]

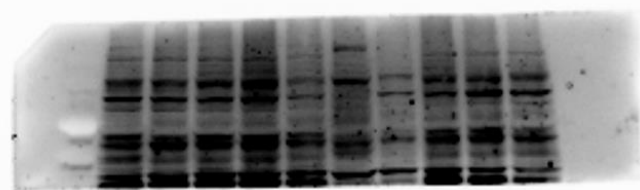

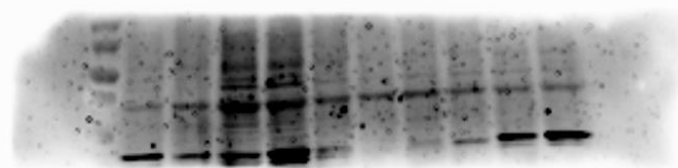

Supplement: d2fo04014j1.zip [file d2fo04014j1.zip]

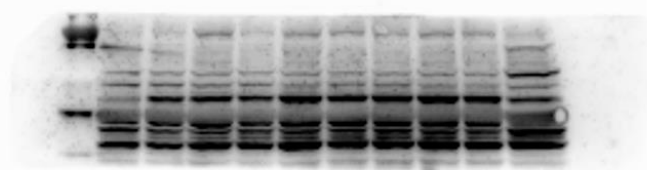

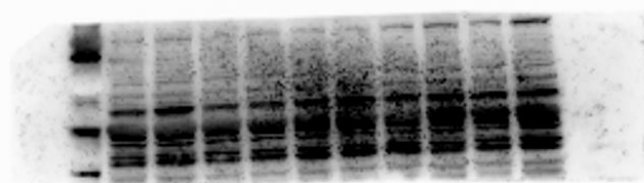

Supplement: d2fo04014j1.zip [file d2fo04014j1.zip]

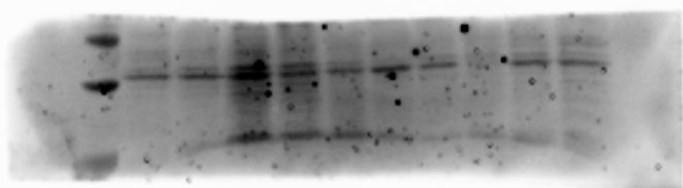

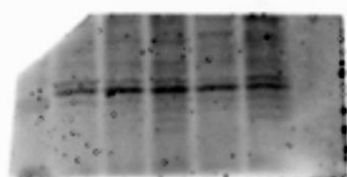

Supplement: d2fo04014j1.zip [file d2fo04014j1.zip]

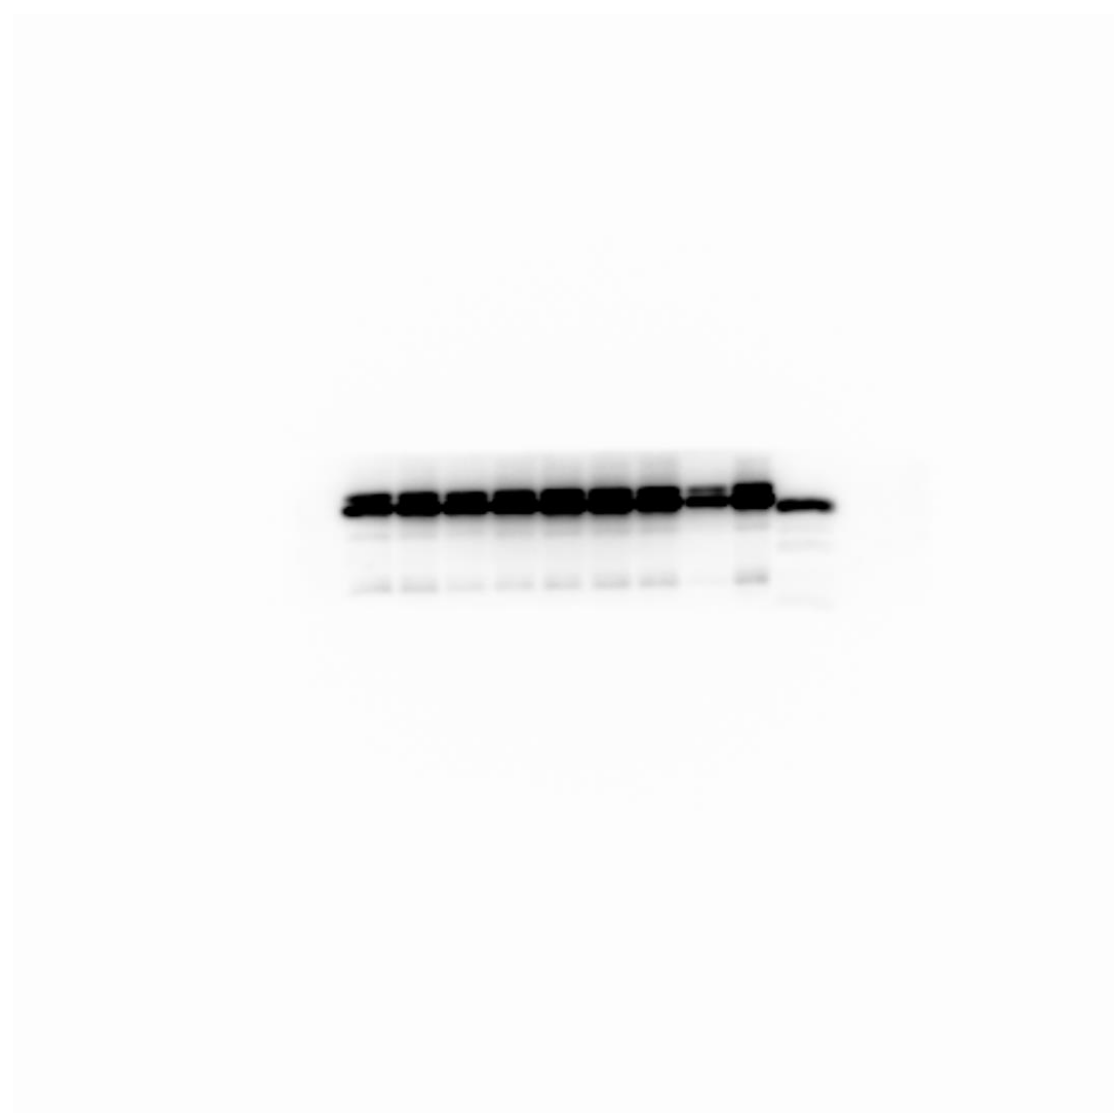

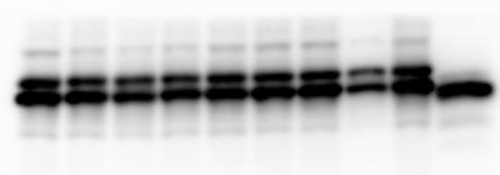

Supplement: d2fo04014j1.zip [file d2fo04014j1.zip]

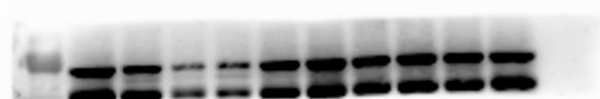

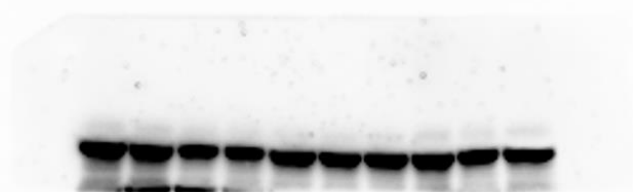

Supplement: d2fo04014j1.zip [file d2fo04014j1.zip]

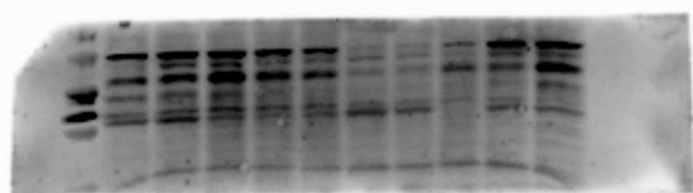

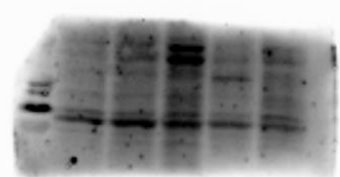

Supplement: d2fo04014j1.zip [file d2fo04014j1.zip]

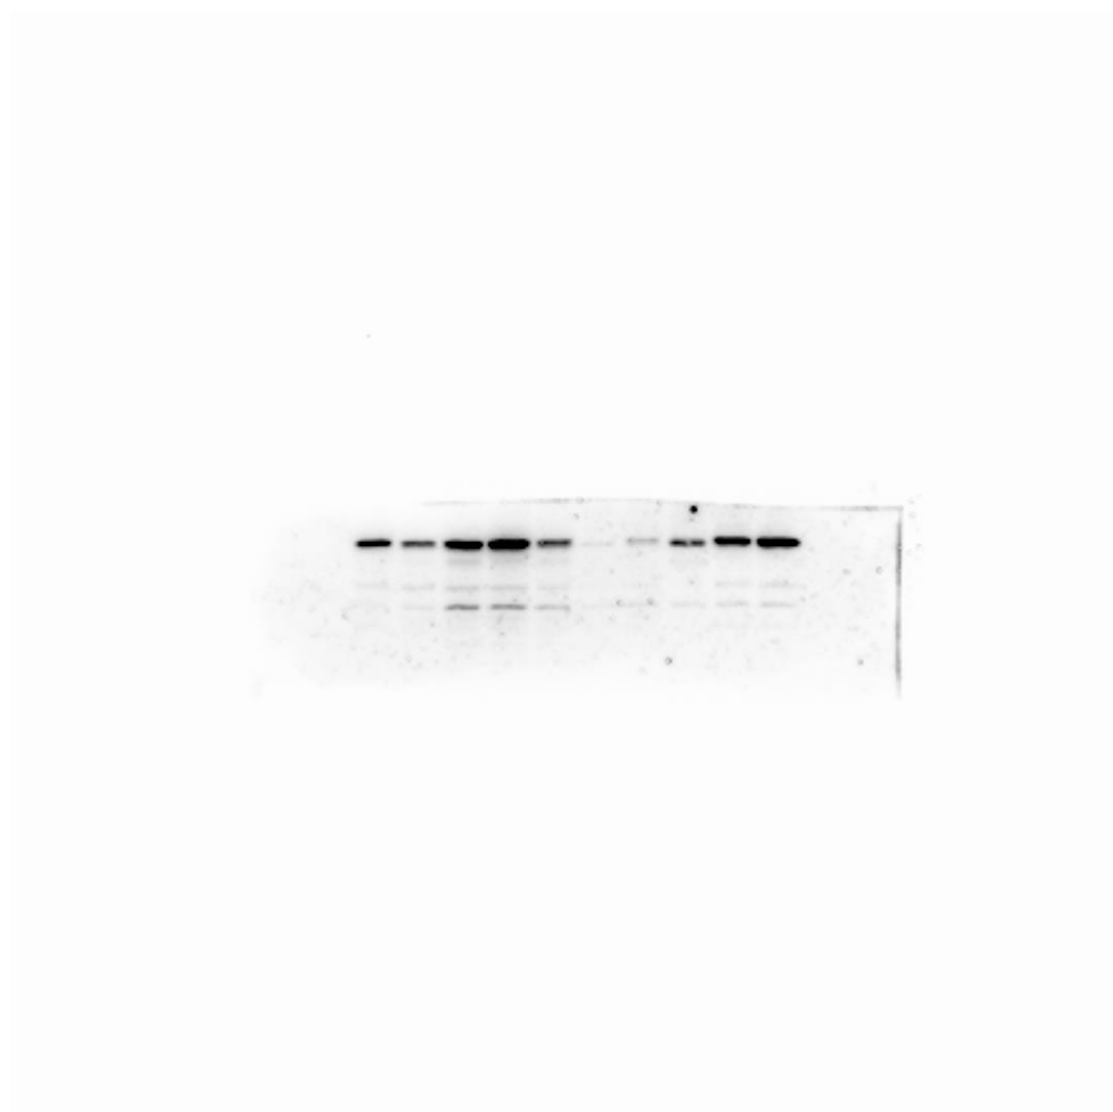

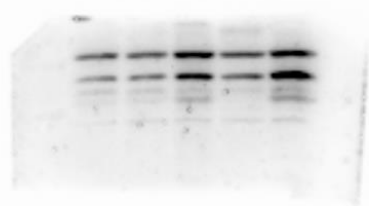

Supplement: d2fo04014j1.zip [file d2fo04014j1.zip]

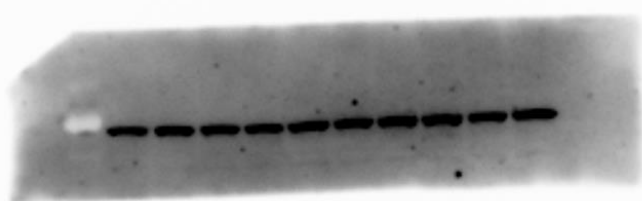

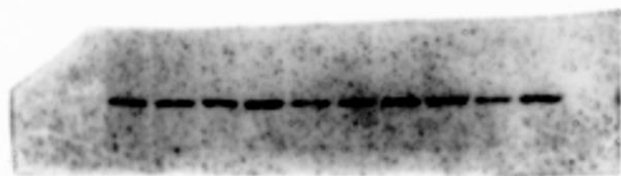

Supplement: d2fo04014j1.zip [file d2fo04014j1.zip]

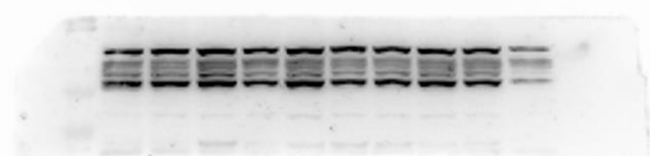

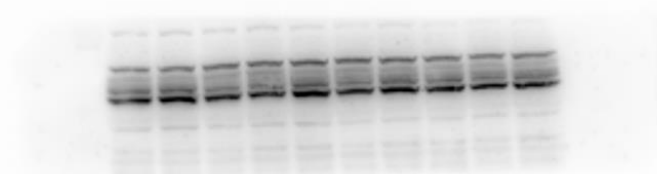

Supplement: d2fo04014j1.zip [file d2fo04014j1.zip]

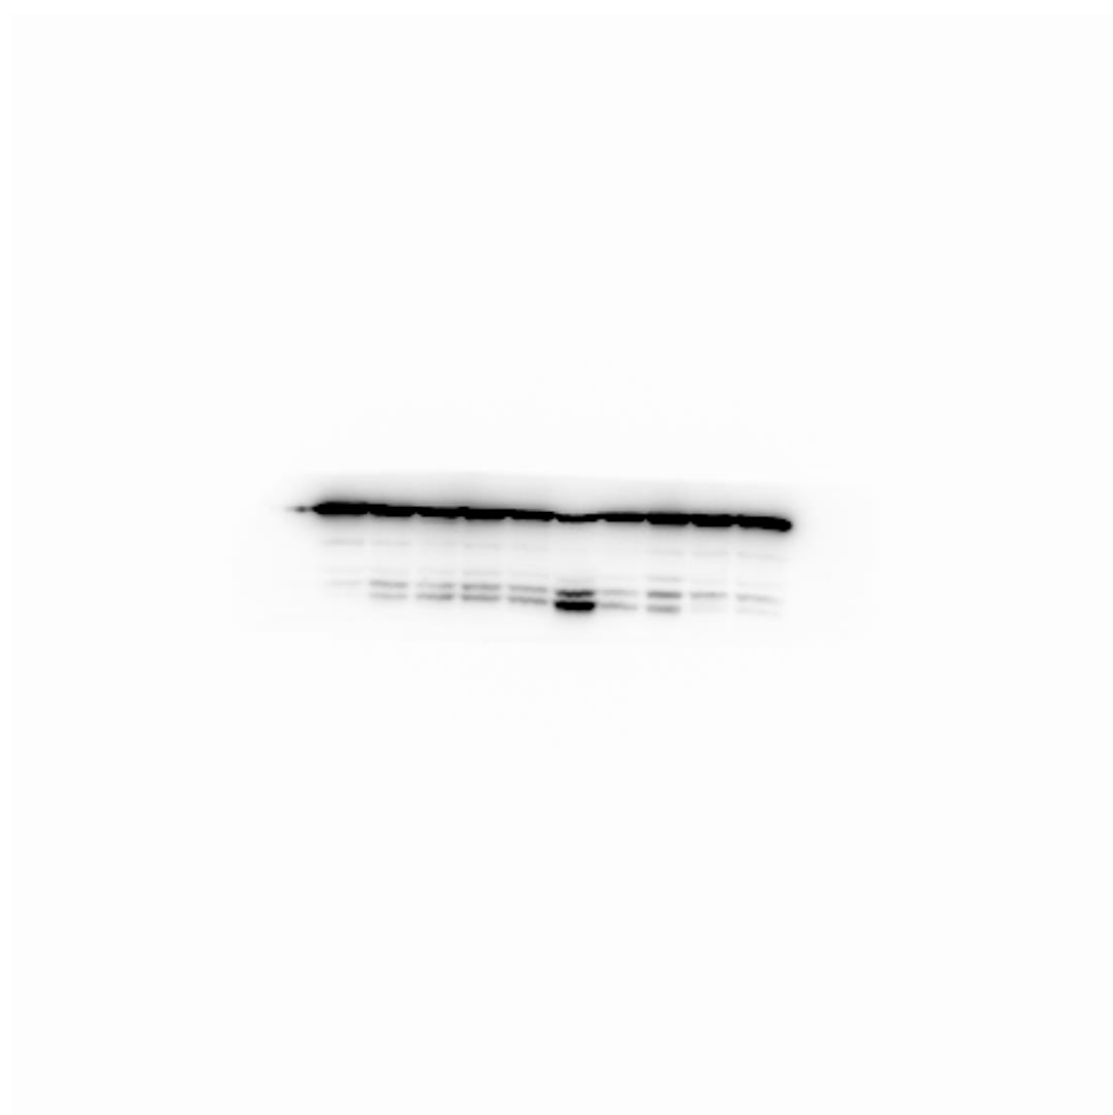

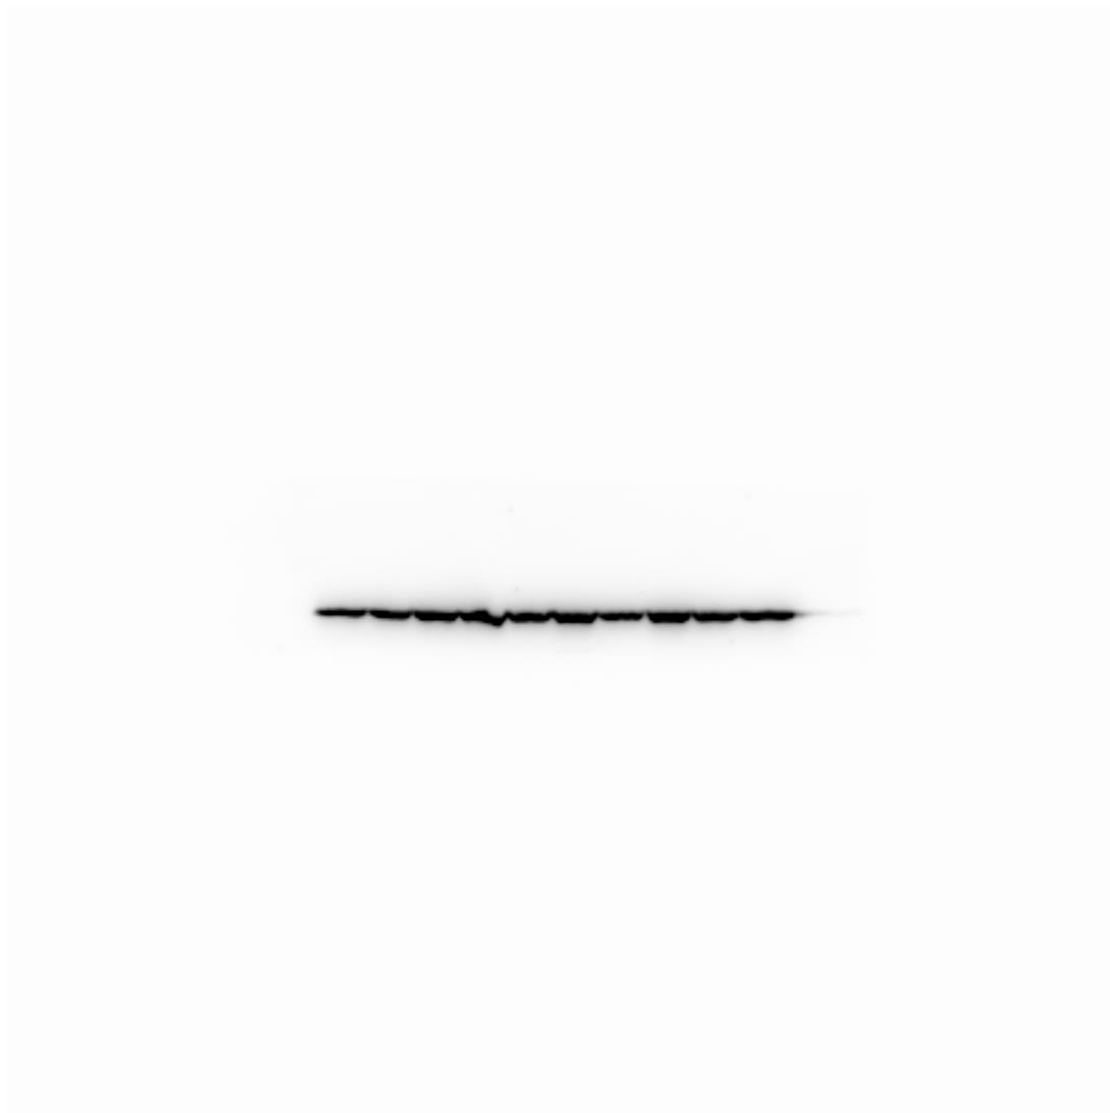

Supplement: d2fo04014j1.zip [file d2fo04014j1.zip]

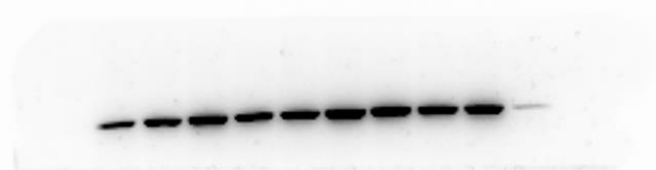

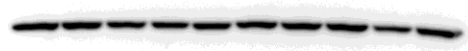

Supplement: d2fo04014j1.zip [file d2fo04014j1.zip]

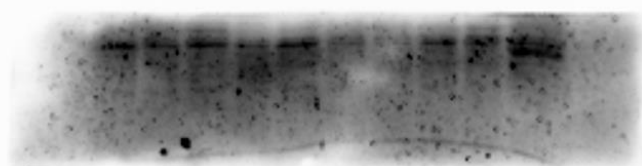

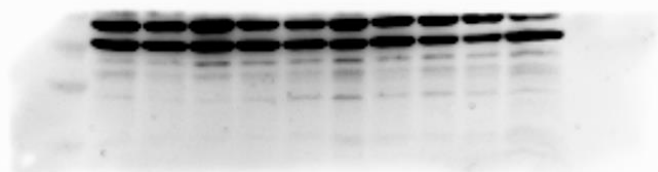

Supplement: d2fo04014j1.zip [file d2fo04014j1.zip]

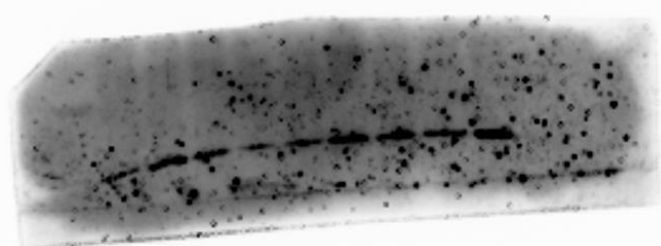

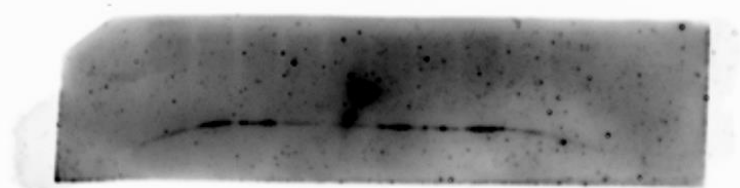

Supplement: d2fo04014j1.zip [file d2fo04014j1.zip]

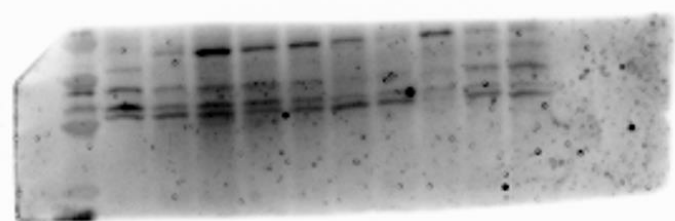

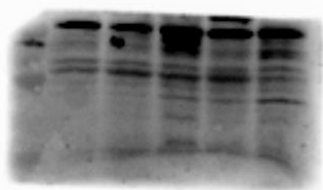

Supplement: d2fo04014j1.zip [file d2fo04014j1.zip]

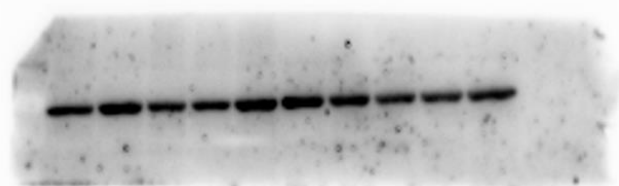

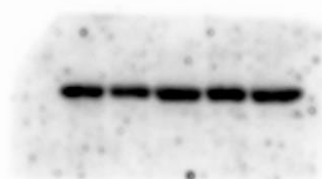

Supplement: d2fo04014j1.zip [file d2fo04014j1.zip]
